# Supplementary material
Source: MDPI journal article supplement (https://www.mdpi.com/2073-445X/12/9/1689)
Supplement: s1 [file s1]

Archive with 2 entries (2 files):
- File S1_plot characteristics.pdf
- File S2_full text of questionnaire.pdf
