# Supplementary material
Source: MDPI journal article supplement (https://www.mdpi.com/2073-445X/12/9/1689)
Supplement: s1 [file s1 › File S1_plot characteristics.pdf]

## Botanical Research Institute of Texas (BRIT) site plots

|                       |                        |                                      |                           |   |  | A    | B    | C    | D    | E    | F    | G    | H    | I    | J    | K    | L    | M    | N    | O    | P    | Q    | R    | S    | T    |  |
|-----------------------|------------------------|--------------------------------------|---------------------------|---|--|------|------|------|------|------|------|------|------|------|------|------|------|------|------|------|------|------|------|------|------|--|
|                       |                        | Plants native to ecoregion (% cover) |                           |   |  | 0.57 | 0.58 | 0.35 | 0.94 | 0.92 | 0.68 | 0.86 | 0.86 | 0.22 | 0.47 | 0.65 | 0.62 | 0.92 | 0.77 | 0.62 | 0.81 | 0.88 | 0.75 | 0.97 | 0.83 |  |
|                       |                        | Plant species richness               |                           |   |  | 5    | 4    | 2    | 5    | 2    | 2    | 7    | 7    | 2    | 3    | 3    | 5    | 7    | 7    | 4    | 4    | 4    | 4    | 6    | 7    |  |
|                       |                        | Soil moisture adaptation index       |                           |   |  | 7    | 7.2  | 8.5  | 1.4  | 1    | 7.2  | 1.8  | 2.8  | 8.5  | 7.5  | 6.8  | 6.9  | 1.4  | 5.8  | 6.4  | 7.3  | 5    | 0.8  | 4.6  | 0.9  |  |
| Species list per plot |                        |                                      |                           |   |  |      |      |      |      |      |      |      |      |      |      |      |      |      |      |      |      |      |      |      |      |  |
| USDA                  | Common Name            | Genus                                | Species                   |   |  |      |      |      |      |      |      |      |      |      |      |      |      |      |      |      |      |      |      |      |      |  |
| ANGE                  | Big bluestem           | Andropogon                           | gerardii                  |   |  |      |      |      |      |      |      |      |      |      |      |      |      | X    |      |      |      |      | X    |      |      |  |
| ANGL2                 | Bushy bluestem         | Andropogon                           | glomeratus                |   |  |      |      |      |      |      |      |      |      |      |      |      |      |      |      | X    |      |      |      |      |      |  |
| ASOE                  | Sidecluster Milkweed   | Asclepias                            | oenotheroides             |   |  |      |      |      |      |      |      |      |      |      |      |      |      |      |      |      |      | X    |      |      | X    |  |
| ASTU                  | Butterfly Milkweed     | Asclepias                            | tuberosa                  |   |  |      |      |      |      |      |      |      | X    |      |      |      |      |      |      |      |      |      |      |      | X    |  |
| ASVI2                 | Green Milkweed         | Asclepias                            | viridis                   |   |  |      |      |      |      |      |      |      |      |      |      |      |      | X    |      |      |      |      |      |      |      |  |
| BOCU                  | Sideoats grama         | Bouteloua                            | curtipendula              |   |  |      |      |      |      |      |      |      |      |      |      |      |      |      | X    |      |      |      |      | X    |      |  |
| BODA2                 | Buffalo Grass          | Buchloe                              | dactyloides               |   |  |      |      | X    | X    |      |      | X    | X    |      |      |      |      | X    |      |      |      | X    |      |      | X    |  |
| CAIN2                 | Winecup                | Callirhoe                            | involuncrata              |   |  |      |      |      |      |      |      | X    | X    |      |      |      |      | X    |      |      |      |      |      |      |      |  |
| CAHA14                | Sundrops               | Calylophus                           | hartwegii                 |   |  |      |      |      |      |      |      |      |      |      |      |      |      |      |      |      |      |      |      |      |      |  |
| CABL                  | Eastern woodland sedge | Carex                                | blanda                    |   |  | X    |      |      |      |      |      |      |      |      |      | X    | X    |      |      | X    | X    |      |      |      |      |  |
| COCO13                | Blue Mist Flower       | Conoclinium                          | coelestinum               |   |  |      |      |      |      |      |      |      |      |      |      |      | X    |      |      |      | X    |      |      |      |      |  |
| COGR10                | Gregg's mistflower     | Conoclinium                          | greggii                   |   |  |      |      |      |      |      |      |      |      |      |      |      |      |      | X    |      |      | X    |      |      |      |  |
| CYDA                  | Bermuda grass          | Cynodon                              | dactylon                  | X |  |      |      |      |      | X    |      |      |      |      | X    |      |      |      | X    |      |      |      |      |      |      |  |
| DAFR2                 | Black Prairie-Clover   | Dalea                                | frutescens                |   |  |      |      |      |      |      |      |      | X    |      |      |      |      |      |      |      |      |      |      |      | X    |  |
| DAPU5                 | Purple Prairie-Clover  | Dalea                                | purpurea                  |   |  |      |      |      | X    |      |      |      | X    |      |      |      |      |      |      |      |      |      |      |      |      |  |
| ECPU                  | Purple Coneflower      | Echinacea                            | angustifolia/purpurea     |   |  |      |      |      | X    |      |      |      |      |      |      |      |      |      |      |      |      |      |      |      |      |  |
| ENPE4                 | Engelmann's Daisy      | Engelmannia                          | peristenia                |   |  |      |      |      |      |      |      |      | X    |      |      |      |      |      |      |      |      |      |      |      |      |  |
| OELI2                 | Lindheimer's Gaura     | Gaura                                | lindheimeri               | X |  |      |      |      |      |      |      |      |      |      |      |      |      |      | X    |      |      | X    |      | X    |      |  |
| ILVO                  | Yaupon Holly           | Ilex                                 | vomitorea v. nana         |   |  |      |      |      |      |      |      |      |      |      |      |      |      |      |      |      |      |      |      |      |      |  |
| LANTA                 | Texas lantana          | Lantana                              | urticoides                |   |  |      |      |      |      |      |      |      |      |      |      |      |      | X    |      |      |      |      |      |      |      |  |
| LEFR3                 | Texas Sage             | Leucophyllum                         | frutescens                |   |  |      |      |      | X    |      |      |      |      |      |      |      |      | X    |      |      |      |      |      |      |      |  |
| MATR3                 | Agarita                | Mahonia                              | trifoliolata              |   |  |      |      |      |      |      |      | X    |      |      |      |      |      |      |      |      |      |      |      |      | X    |  |
| MUCA2                 | Pink Muhly             | Muhlenbergia                         | capillaris                |   |  | X    |      |      |      |      |      |      |      |      |      | X    | X    |      |      | X    |      |      |      |      |      |  |
| MULI                  | Lindheimer's Muhly     | Muhlenbergia                         | lindheimeri               | X |  |      |      |      |      |      | X    |      |      |      | X    |      |      |      |      |      |      | X    |      |      |      |  |
| MOCE2                 | Wax myrtle             | Myrica                               | cerifera var. nana        |   |  | X    | X    |      |      |      |      |      |      | X    |      |      | X    |      |      | X    | X    |      |      |      |      |  |
| PETE3                 | Penstemon              | Penstemon                            | tenuis                    | X |  |      |      |      |      |      |      |      |      |      |      |      |      |      | X    |      |      |      |      | X    |      |  |
| RHAR4                 | Aromatic Sumac         | Rhus                                 | aromatica                 |   |  |      |      |      |      | X    |      |      |      |      |      |      |      |      |      |      |      |      | X    |      |      |  |
| RUMA3                 | Giant coneflower       | Rudbeckia                            | maxima                    | X |  |      |      |      |      |      |      |      |      |      | X    |      |      |      |      |      |      | X    |      | X    |      |  |
| SAFA2                 | Mealy Blue Sage        | Salvia                               | farinacea                 |   |  |      |      |      |      |      |      |      | X    |      |      |      |      | X    |      |      |      |      |      |      |      |  |
| SAGR4                 | Autumn sage            | Salvia                               | gregii                    |   |  |      |      |      |      |      |      | X    |      |      |      |      |      |      |      |      |      |      |      |      | X    |  |
| SCSC                  | Little Bluestem        | Schizachyrium                        | scoparium                 |   |  |      |      |      | X    |      |      |      | X    |      |      |      |      |      |      |      |      |      |      |      |      |  |
| SONU2                 | Indian grass           | Sorghastrum                          | nutans                    |   |  |      |      |      |      |      |      |      |      |      |      |      |      |      | X    |      |      |      | X    |      |      |  |
| STSE                  | St. Augustine          | Stenotaphrum                         | secundatum                |   |  | X    | X    |      |      |      |      |      |      | X    |      |      | X    | X    |      | X    |      |      |      |      |      |  |
| SYOB                  | Aromatic Aster         | Symphotrichum                        | oblongifolium             |   |  |      |      |      |      |      |      | X    |      |      |      |      |      | X    |      |      |      |      | X    |      |      |  |
| WEACH                 | Zexmenia               | Wedelia                              | acapulcensis var. hispida |   |  |      |      |      |      |      |      | X    | X    |      |      |      |      |      | X    |      |      |      |      |      | X    |  |

General Services Administration (GSA) plots

|                       |                        |                                      |                                  | 1    | 2    | 3    | 4    | 5    | 6    | 7    | 8    | 9    | 10   | 11   | 12   | 13   | 14   | 15   | 16   | 17   | 18   | 19   | 20   |
|-----------------------|------------------------|--------------------------------------|----------------------------------|------|------|------|------|------|------|------|------|------|------|------|------|------|------|------|------|------|------|------|------|
|                       |                        | Plants native to ecoregion (% cover) |                                  | 0.96 | 0.97 | 0.93 | 1.00 | 0.93 | 0.67 | 0.64 | 0.67 | 0.98 | 0.91 | 0.78 | 0.95 | 0.83 | 0.96 | 0.87 | 0.97 | 0.97 | 0.87 | 0.82 | 0.95 |
|                       |                        | Plant species richness               |                                  | 3    | 5    | 2    | 4    | 3    | 4    | 5    | 4    | 4    | 5    | 3    | 5    | 4    | 5    | 4    | 4    | 4    | 5    | 2    | 7    |
|                       |                        | Soil moisture adaptation index       |                                  | N/A  |
| Species list per plot |                        |                                      |                                  |      |      |      |      |      |      |      |      |      |      |      |      |      |      |      |      |      |      |      |      |
| USDA                  | Common Name            | Genus                                | Species                          |      |      |      |      |      |      |      |      |      |      |      |      |      |      |      |      |      |      |      |      |
| ANGE                  | Big bluestem           | <i>Andropogon</i>                    | <i>gerardii</i>                  |      |      |      |      |      |      |      |      |      |      |      |      |      |      |      |      |      |      |      |      |
| ANGL2                 | Bushy bluestem         | <i>Andropogon</i>                    | <i>glomeratus</i>                |      |      |      |      |      |      |      |      |      |      |      |      |      |      |      |      |      |      |      |      |
| ASOE                  | Sidecluster Milkweed   | <i>Asclepias</i>                     | <i>oenotheroides</i>             |      |      |      |      | x    |      |      |      |      |      |      |      |      |      |      |      |      |      |      |      |
| ASTU                  | Butterfly Milkweed     | <i>Asclepias</i>                     | <i>tuberosa</i>                  |      |      |      |      |      |      |      |      |      |      |      |      |      | x    |      |      | x    |      |      |      |
| ASV12                 | Green Milkweed         | <i>Asclepias</i>                     | <i>viridis</i>                   |      |      |      |      |      |      |      |      |      |      |      |      |      |      |      |      |      |      |      |      |
| BOCU                  | Sideoats grama         | <i>Bouteloua</i>                     | <i>curtipendula</i>              |      |      |      |      |      |      |      |      |      |      |      |      |      |      |      |      |      |      |      |      |
| BODA2                 | Buffalo Grass          | <i>Buchloe</i>                       | <i>dactyloides</i>               |      |      | x    | x    |      | x    | x    | x    | x    | x    |      | x    |      | x    | x    |      | x    | x    |      | x    |
| CAIN2                 | Winecup                | <i>Callirhoe</i>                     | <i>involucrata</i>               |      |      |      | x    | x    |      | x    |      |      | x    |      |      | x    | x    |      | x    |      |      |      | x    |
| CAHA14                | Sundrops               | <i>Calylophus</i>                    | <i>hartwegii</i>                 |      |      |      |      |      |      |      |      | x    |      |      |      |      |      |      |      |      |      |      | x    |
| CABL                  | Eastern woodland sedge | <i>Carex</i>                         | <i>blanda</i>                    |      |      |      |      |      |      |      |      |      |      |      |      |      |      |      |      |      |      |      |      |
| COCO13                | Blue Mist Flower       | <i>Conoclinium</i>                   | <i>coelestinum</i>               |      |      |      |      |      |      |      |      |      |      |      |      |      |      |      |      |      |      |      |      |
| COGR10                | Gregg's mistflower     | <i>Conoclinium</i>                   | <i>greggii</i>                   |      |      |      |      |      |      |      |      |      |      |      |      |      |      |      |      |      |      |      |      |
| CYDA                  | Bermuda grass          | <i>Cynodon</i>                       | <i>dactylon</i>                  |      |      |      |      |      |      |      |      |      |      |      |      |      |      |      |      |      |      |      |      |
| DAFR2                 | Black Prairie-Clover   | <i>Dalea</i>                         | <i>frutescens</i>                |      |      |      |      |      |      |      | x    | x    |      | x    |      |      |      | x    | x    |      |      |      | x    |
| DAPU5                 | Purple Prairie-Clover  | <i>Dalea</i>                         | <i>purpurea</i>                  |      |      |      |      |      |      |      |      |      |      |      |      |      |      |      |      |      |      |      |      |
| ECPU                  | Purple Coneflower      | <i>Echinacea</i>                     | <i>angustifolia/purpurea</i>     |      |      |      |      |      |      |      |      |      |      |      | x    |      |      | x    |      |      |      |      | x    |
| ENPE4                 | Engelmann's Daisy      | <i>Engelmannia</i>                   | <i>peristenia</i>                | x    |      |      | x    |      |      | x    |      |      |      |      |      | x    |      |      |      |      |      |      |      |
| OELI2                 | Lindheimer's Gaura     | <i>Gaura</i>                         | <i>lindheimeri</i>               |      |      |      |      |      |      |      |      |      |      |      |      |      |      |      |      |      |      |      |      |
| ILVO                  | Yaupon Holly           | <i>Ilex</i>                          | <i>vomitaria v. nana</i>         |      |      |      |      |      |      |      |      |      |      |      |      | x    |      |      |      |      |      |      |      |
| LANTA                 | Texas Iantana          | <i>Lantana</i>                       | <i>urticoides</i>                |      | x    |      |      |      | x    | x    |      |      |      |      | x    |      | x    |      |      | x    |      |      |      |
| LEFR3                 | Texas Sage             | <i>Leucophyllum</i>                  | <i>frutescens</i>                |      | x    |      |      |      |      |      |      | x    |      |      | x    |      |      |      |      |      |      |      |      |
| MATR3                 | Agarita                | <i>Mahonia</i>                       | <i>trifoliolata</i>              | x    |      |      |      |      |      |      |      |      |      | x    |      |      |      | x    |      |      | x    | x    | x    |
| MUCA2                 | Pink Muhly             | <i>Muhlenbergia</i>                  | <i>capillaris</i>                |      |      |      |      |      |      |      |      |      |      |      |      |      |      |      |      |      |      |      |      |
| MULI                  | Lindheimer's Muhly     | <i>Muhlenbergia</i>                  | <i>lindheimeri</i>               |      |      |      |      |      |      |      |      |      |      |      |      |      |      |      |      |      |      |      |      |
| MOCE2                 | Wax myrtle             | <i>Myrica</i>                        | <i>cerifera var. nana</i>        |      |      |      |      |      |      |      |      |      |      |      |      |      |      |      |      |      |      |      |      |
| PETE3                 | Penstemon              | <i>Penstemon</i>                     | <i>tenuis</i>                    |      |      |      |      |      |      |      |      |      |      |      |      |      |      |      |      |      |      |      |      |
| RHAR4                 | Aromatic Sumac         | <i>Rhus</i>                          | <i>aromatica</i>                 |      |      | x    |      | x    |      |      |      |      | x    |      |      |      |      | x    |      |      |      |      | x    |
| RUMA3                 | Giant coneflower       | <i>Rudbeckia</i>                     | <i>maxima</i>                    |      |      |      |      |      |      |      |      |      |      |      |      |      |      |      |      |      |      |      |      |
| SAFA2                 | Mealy Blue Sage        | <i>Salvia</i>                        | <i>farinacea</i>                 |      | x    |      |      |      |      |      | x    |      |      |      |      |      |      |      |      | x    |      |      |      |
| SAGR4                 | Autumn sage            | <i>Salvia</i>                        | <i>gregii</i>                    |      |      |      |      |      |      |      |      |      |      |      |      |      |      |      |      |      |      |      |      |
| SCSC                  | Little Bluestem        | <i>Schizachyrium</i>                 | <i>scoparium</i>                 | x    | x    |      | x    |      |      | x    |      | x    |      |      |      |      |      | x    |      |      |      | x    |      |
| SONU2                 | Indian grass           | <i>Sorghastrum</i>                   | <i>nutans</i>                    |      |      |      |      |      |      |      |      |      |      |      |      |      |      |      |      |      |      |      |      |
| STSE                  | St. Augustine          | <i>Stenotaphrum</i>                  | <i>secundatum</i>                |      |      |      |      |      |      |      |      |      |      |      |      |      |      |      |      |      |      |      |      |
| SYOB                  | Aromatic Aster         | <i>Symphiotrichum</i>                | <i>oblongifolium</i>             |      |      |      |      |      |      |      |      |      | x    |      |      | x    |      | x    |      |      | x    |      |      |
| WEACH                 | Zexmenia               | <i>Wedelia</i>                       | <i>acapulcensis var. hispida</i> |      |      | x    |      | x    | x    |      |      |      |      | x    | x    |      | x    |      |      |      | x    |      |      |
