# Supplementary material
Source: MDPI journal article supplement (https://www.mdpi.com/2073-445X/12/9/1689)
Supplement: s1 [file s1 › File S2_full text of questionnaire.pdf]

**We invite you to participate in a survey  
about sustainable landscape designs.**

**Your participation is very important to us,  
and we value the information you provide!**

### **YOUR RIGHTS AS A SURVEY PARTICIPANT**

- **Why are you receiving this survey?** You're receiving this survey because you are a volunteer or visitor interested in Texas landscapes and botany.
- **How long will this survey take?** This survey should take 15 minutes or less.
- **Who is conducting this survey?** This survey is being conducted by the Botanical Research Institute of Texas in conjunction with the Wild Basin Creative Research Center at St. Edward's University.
- **What is the goal of this survey?** The goal of this survey is to understand public perceptions of various landscape designs. This information will allow us to better understand which combinations of plants are rated as aesthetically pleasing and which are not. The results of this survey will be used for research purposes and may be shared at conferences and in journals.
- **Will your identity be protected?** Yes. We are not collecting your name as part of this survey. In addition, all responses to this survey will only be reported in summary form, with no links to individual information.
- **Is your participation necessary?** Your participation is important to us, but participation in this survey is completely voluntary. You are free to withdraw from the study at any time without penalty. This survey is stand-alone, and you will not be contacted for further information after completing this survey (unless you choose to participate in future research efforts). Completing this survey indicates your consent to participate in this research project.
- **Whom should you contact for more information?** Please contact Dr. Amy Belaire (512-327-7622, [jbelaire@stedwards.edu](mailto:jbelaire@stedwards.edu)) if you have any questions about the survey. If you have any questions about your rights as a research participant, please contact the St. Edward's University Institutional Research Board ([IRB@stedwards.edu](mailto:IRB@stedwards.edu)).

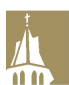

**ST. EDWARD'S  
UNIVERSITY**

Institutional Review Board

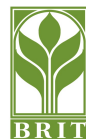

**BOTANICAL RESEARCH  
INSTITUTE OF TEXAS®**

**For each of the photographs that follow, please indicate on the scale next to each photograph how much you like or dislike the landscape depicted.**

A very high rating on the scale (*for example, 7*) means that you like the landscape very much, while a very low rating (*for example, 1*) means that you strongly dislike that type of landscape. A rating in the middle (*for example, 4*) means that you don't feel much either way about that particular landscape.

Please rate each landscape independently. We are interested in your independent rating for each landscape rather than a relative ranking of the landscapes.

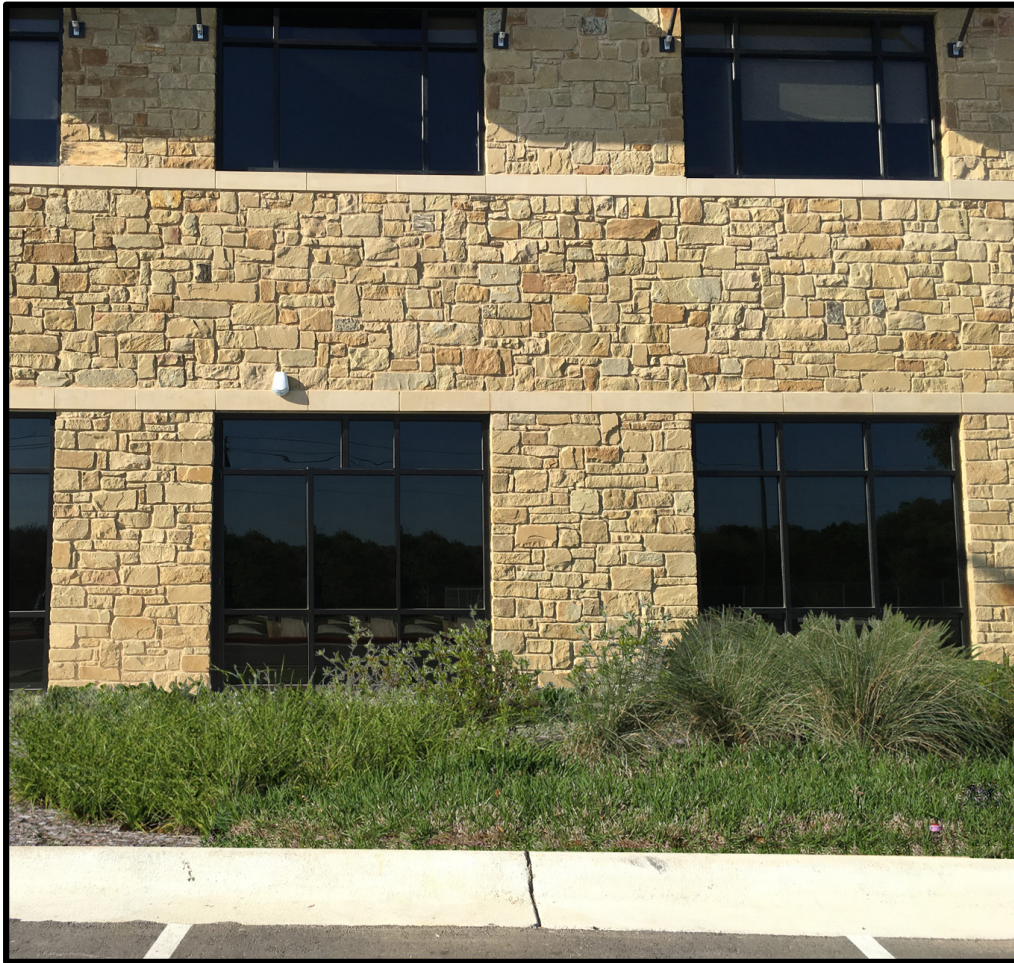

1. How much do you like the landscape in the photo above? ***Circle one.***

1

2

3

4

5

6

7

Dislike  
very much

Neutral

Like very  
much

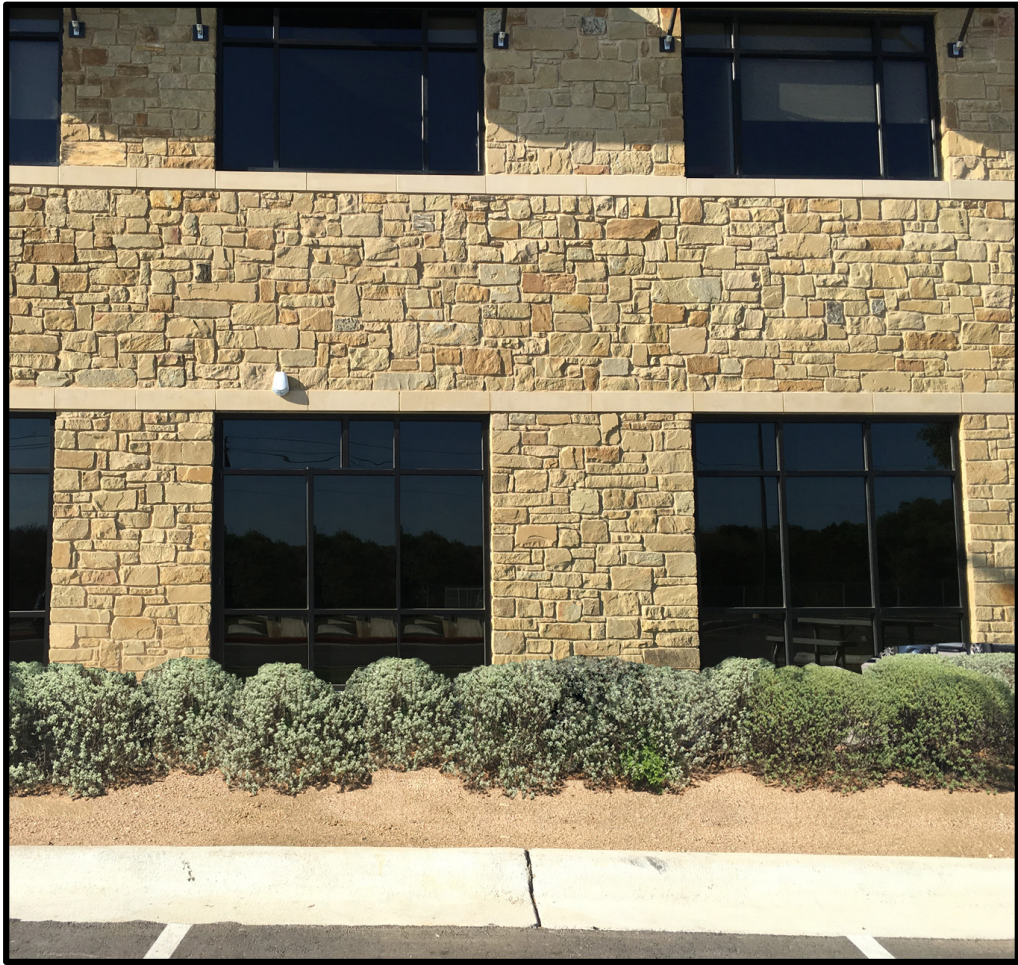

2. How much do you like the landscape in the photo above? ***Circle one.***

1

2

3

4

5

6

7

Dislike  
very much

Neutral

Like very  
much

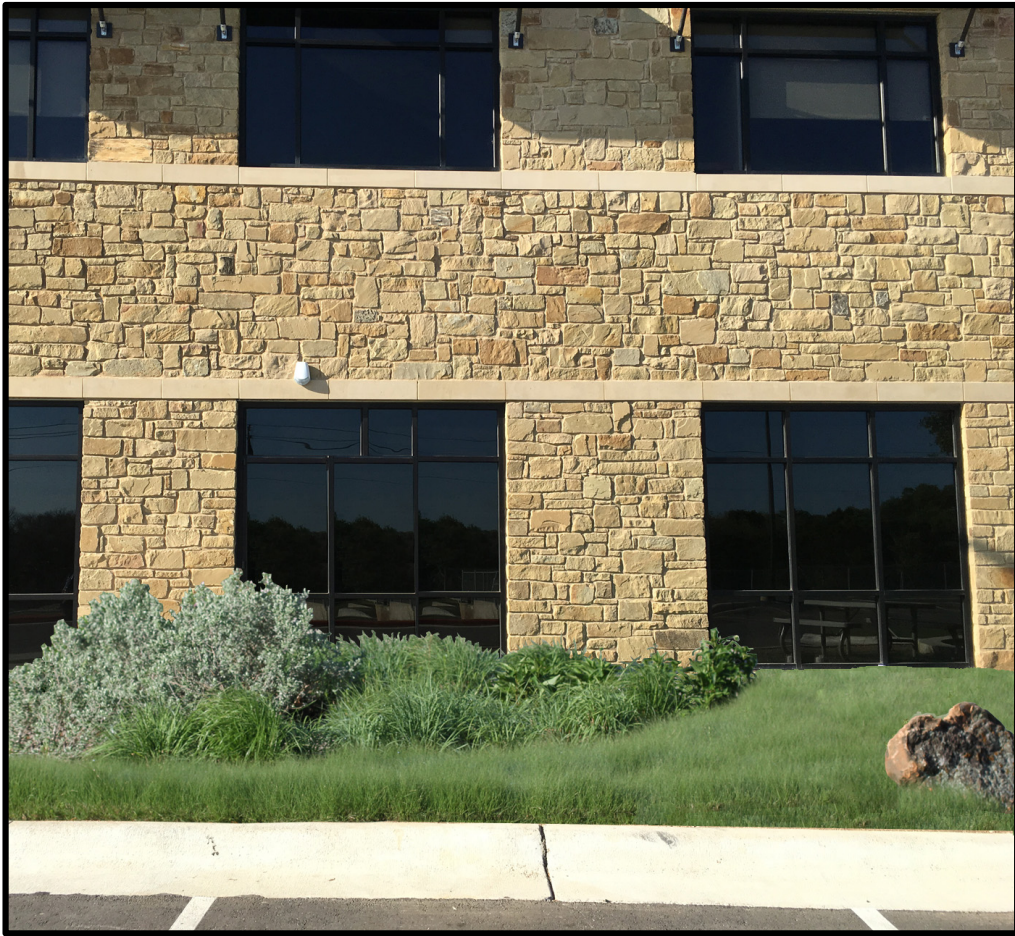

3. How much do you like the landscape in the photo above? ***Circle one.***

1

2

3

4

5

6

7

Dislike  
very much

Neutral

Like very  
much

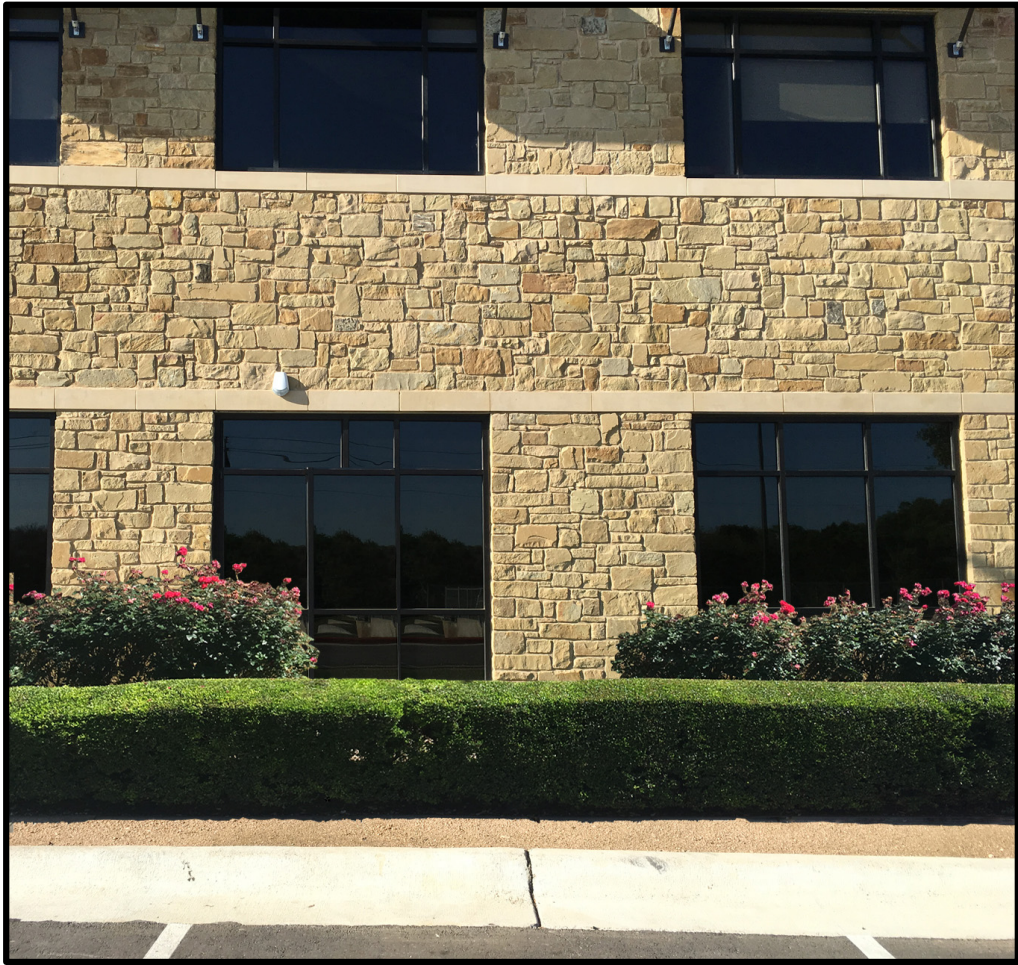

4. How much do you like the landscape in the photo above? ***Circle one.***

1

2

3

4

5

6

7

Dislike  
very much

Neutral

Like very  
much

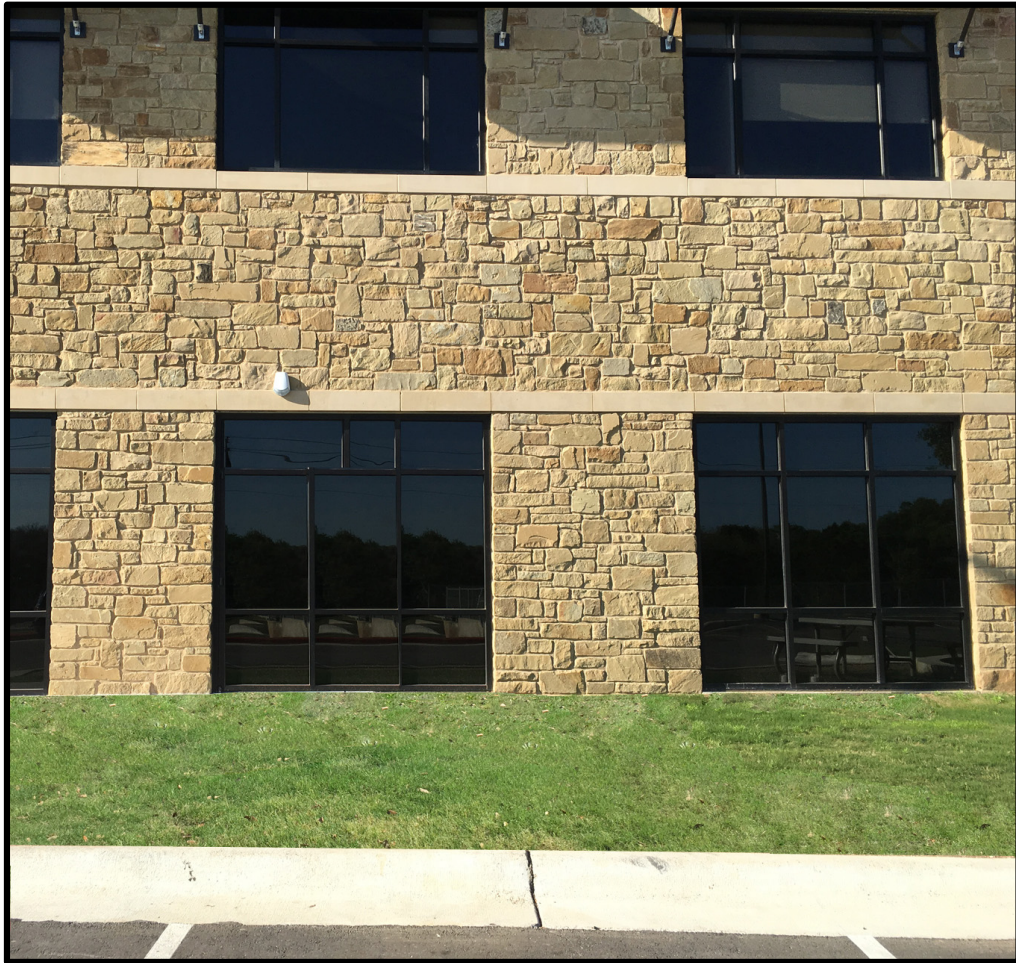

5. How much do you like the landscape in the photo above? ***Circle one.***

|                      |   |   |         |   |   |                   |
|----------------------|---|---|---------|---|---|-------------------|
| 1                    | 2 | 3 | 4       | 5 | 6 | 7                 |
| Dislike<br>very much |   |   | Neutral |   |   | Like very<br>much |

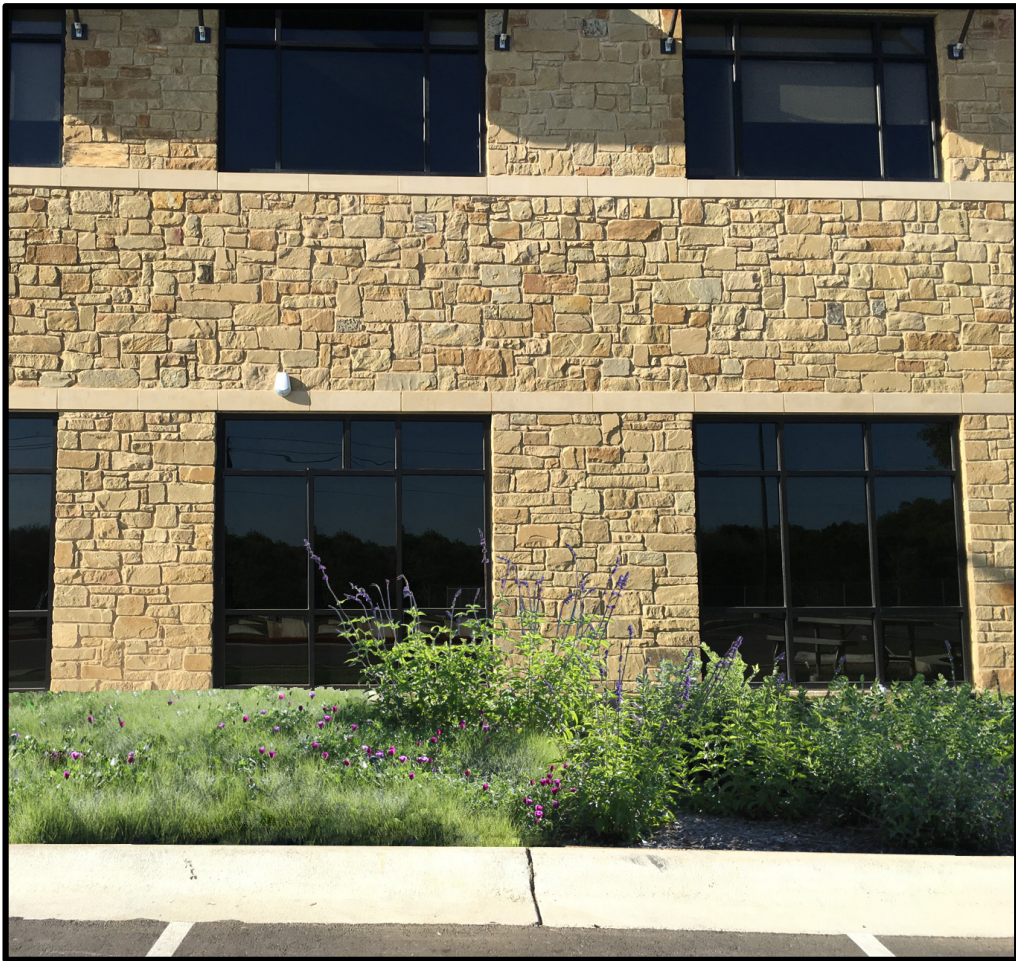

6. How much do you like the landscape in the photo above? ***Circle one.***

1

2

3

4

5

6

7

Dislike  
very much

Neutral

Like very  
much

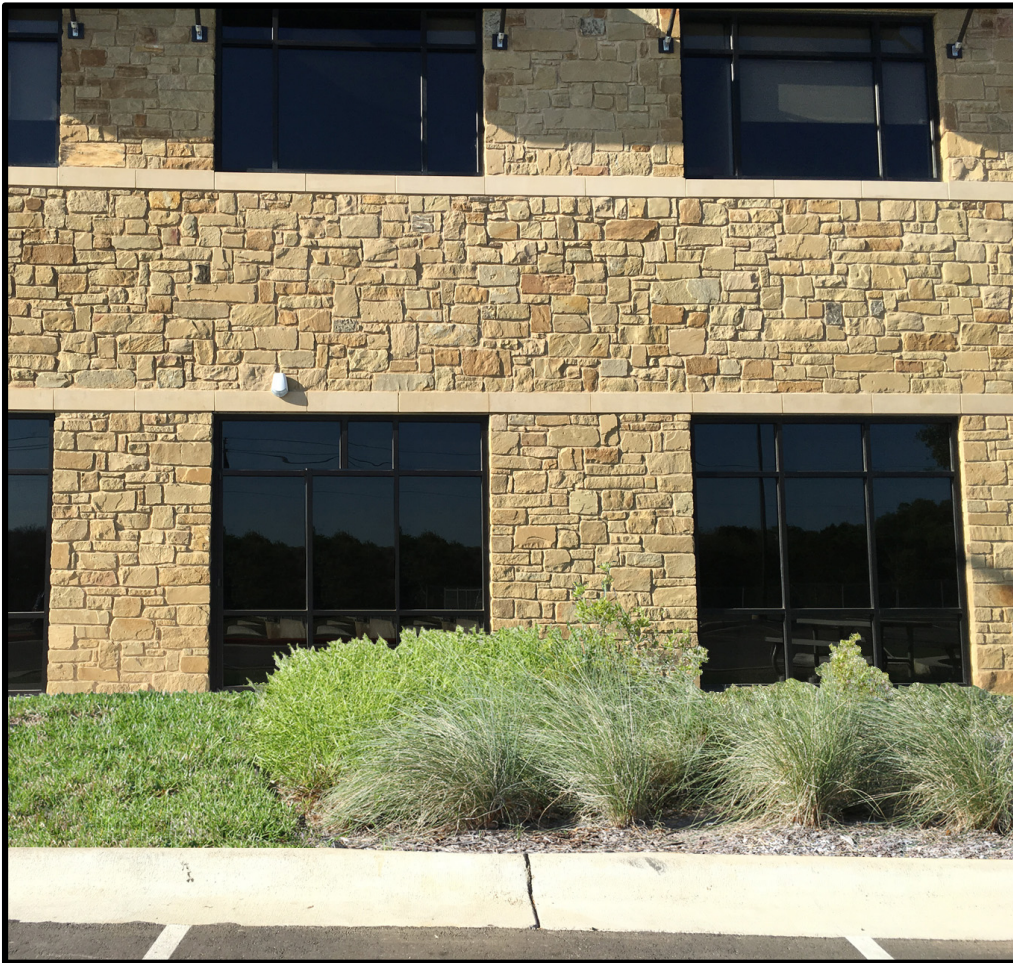

7. How much do you like the landscape in the photo above? ***Circle one.***

1

2

3

4

5

6

7

Dislike  
very much

Neutral

Like very  
much

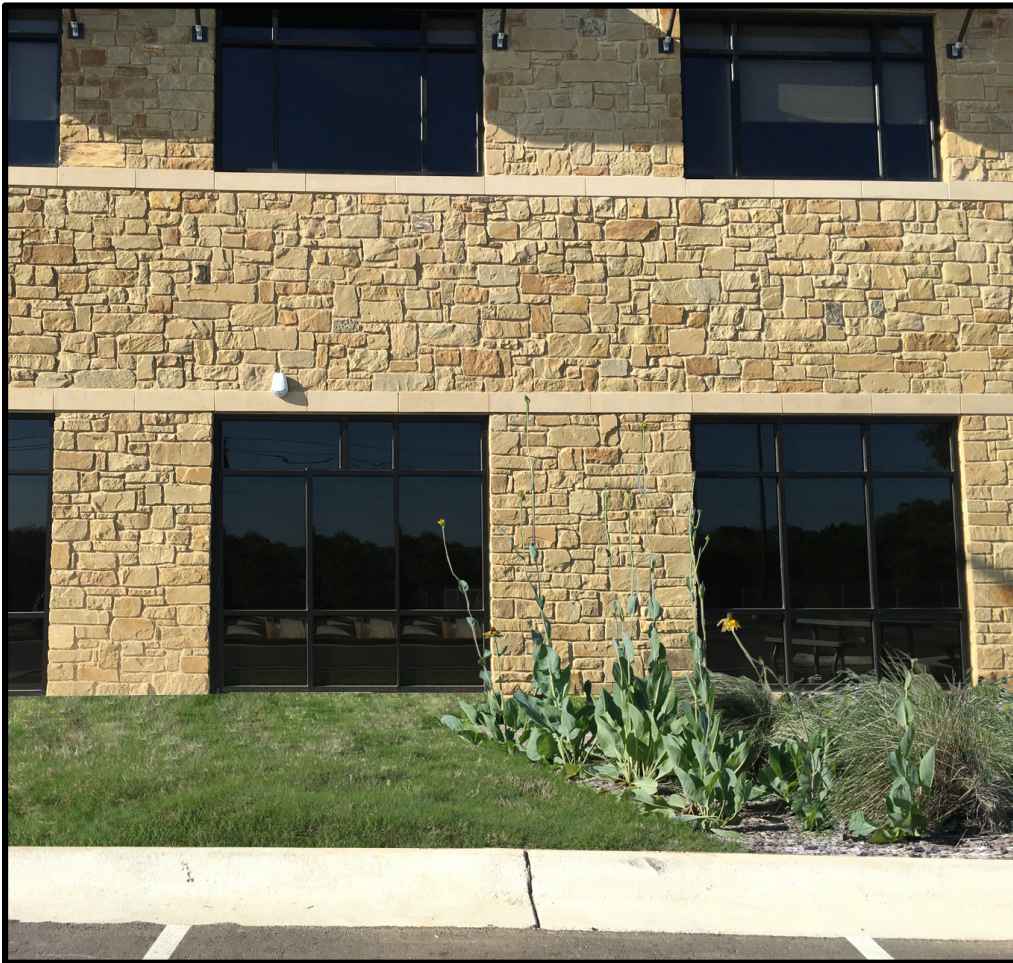

8. How much do you like the landscape in the photo above? ***Circle one.***

1

2

3

4

5

6

7

Dislike  
very much

Neutral

Like very  
much

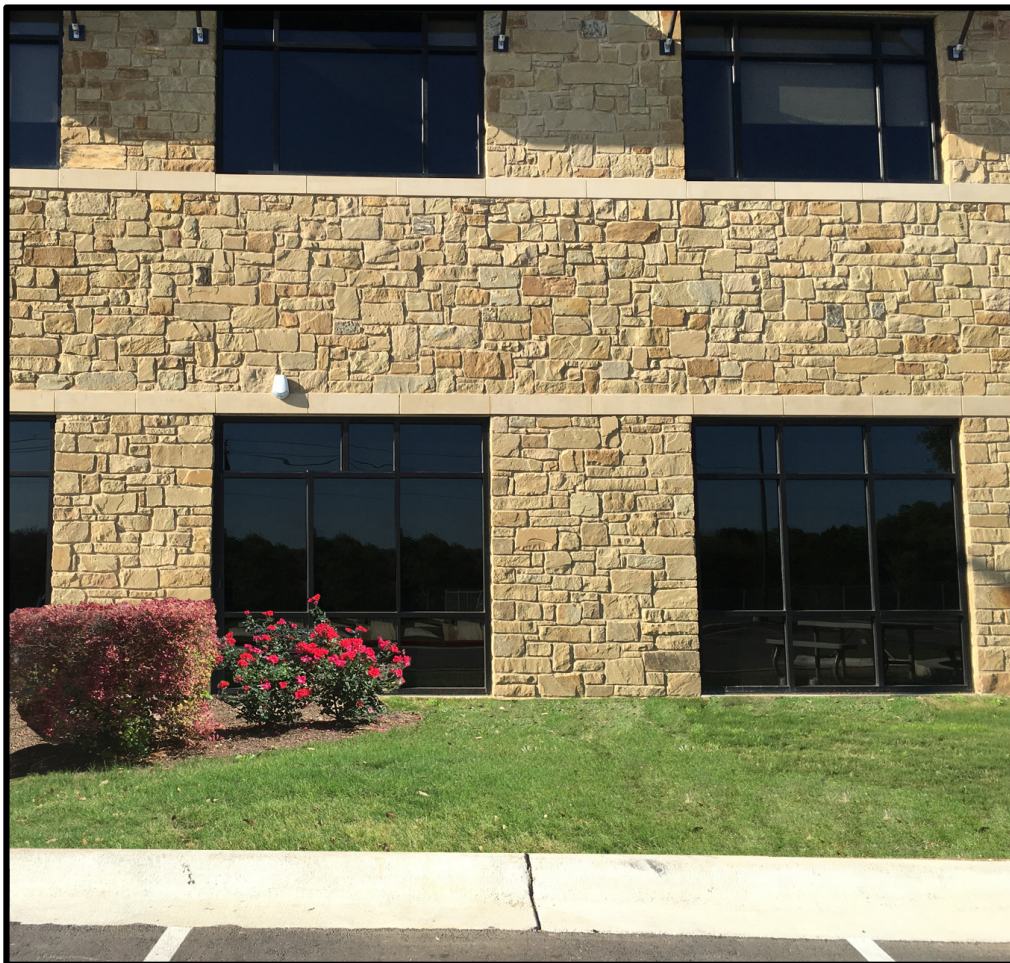

9. How much do you like the landscape in the photo above? ***Circle one.***

1

2

3

4

5

6

7

Dislike  
very much

Neutral

Like very  
much

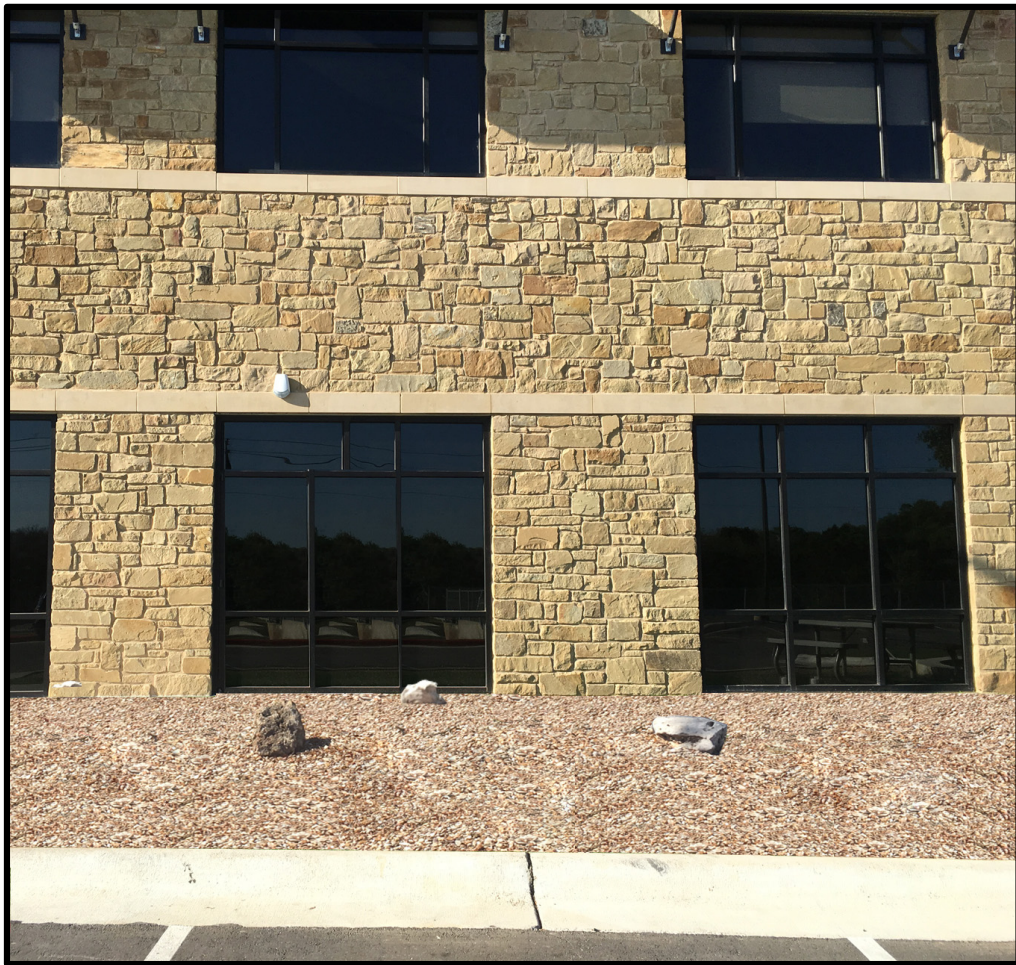

10. How much do you like the landscape in the photo above? ***Circle one.***

|                      |   |   |         |   |   |                   |
|----------------------|---|---|---------|---|---|-------------------|
| 1                    | 2 | 3 | 4       | 5 | 6 | 7                 |
| Dislike<br>very much |   |   | Neutral |   |   | Like very<br>much |

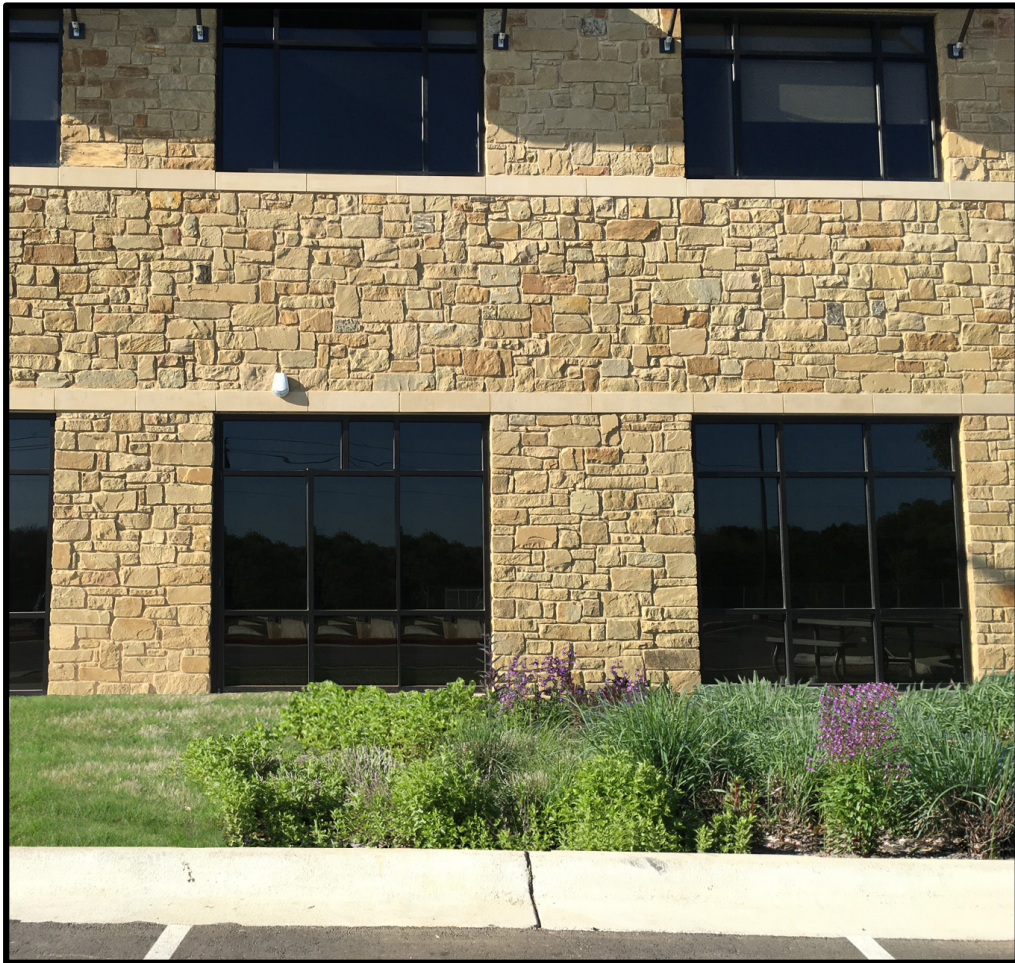

11. How much do you like the landscape in the photo above? ***Circle one.***

1

2

3

4

5

6

7

Dislike  
very much

Neutral

Like very  
much

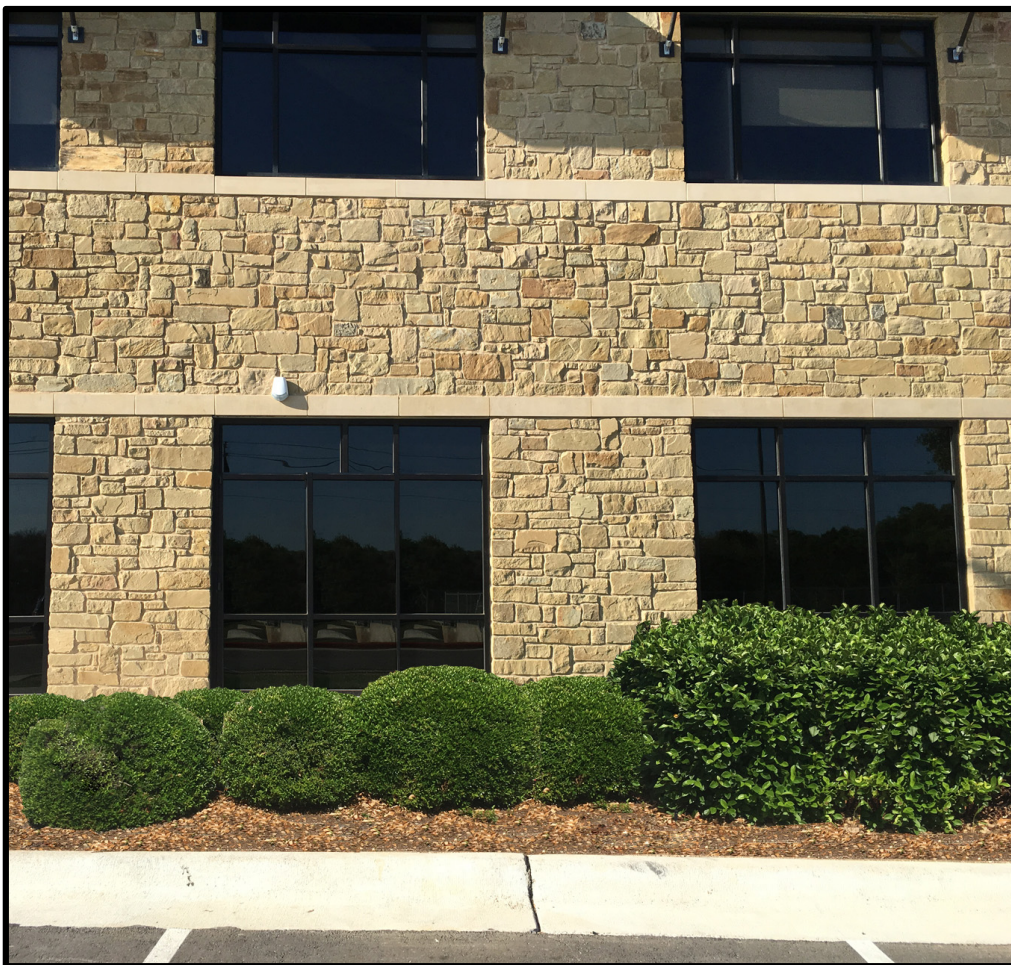

12. How much do you like the landscape in the photo above? ***Circle one.***

1

2

3

4

5

6

7

Dislike  
very much

Neutral

Like very  
much

**Please place the completed survey  
at the BRIT front desk.**

**Thanks for completing this survey!**

Your participation is very important to us, and  
we value the information you provide.
